# Supplementary material for: Quality of Life in the First Year of Cancer Diagnosis among Aboriginal and Non-Aboriginal People Living in Regional and Remote Areas of Australia
Source: MDPI journal article supplement (doi:10.3390/ijerph19010330), 2021-12-29
Supplement: s1 [file s1]

### Supplementary Table S1

AQoL-4D overall utility scores by characteristics in cancer survivors in their first year of diagnosis, NT, Australia.

|                                                     | N (%)                     | AQoL Overall utility Score |                      |
|-----------------------------------------------------|---------------------------|----------------------------|----------------------|
|                                                     |                           | Mean (SD)                  | Median (IQR)         |
| Overall                                             | 63 (100)                  | 0.72 (0.26)                | 0.74<br>(0.62, 0.95) |
| <i>Age</i>                                          |                           |                            |                      |
| Mean (SD); median (IQR)                             | 58.8 (13.70); 58 (48, 69) |                            |                      |
| ≤58 years                                           | 32 (51)                   | 0.73 (0.27)                | 0.77<br>(0.65, 0.95) |
| >58 years                                           | 31 (49)                   | 0.70 (0.26)                | 0.73<br>(0.57, 0.95) |
| <i>Gender</i>                                       |                           |                            |                      |
| Male                                                | 32 (51)                   | 0.70 (0.26)                | 0.74<br>(0.62, 0.92) |
| Female                                              | 31 (49)                   | 0.73 (0.26)                | 0.75<br>(0.62, 0.98) |
| <i>Indigenous Status</i>                            |                           |                            |                      |
| Aboriginal                                          | 20 (32)                   | 0.74 (0.22)                | 0.76<br>(0.66, 0.86) |
| Non-Aboriginal                                      | 43 (68)                   | 0.71 (0.28)                | 0.74<br>(0.56, 0.98) |
| <i>Marital Status</i>                               |                           |                            |                      |
| Partnered (married/de facto)                        | 40 (63)                   | 0.74 (0.25)                | 0.76<br>(0.65, 1.00) |
| Unpartnered (single, divorced, widowed)             | 23 (37)                   | 0.67 (0.27)                | 0.72<br>(0.47, 0.95) |
| <i>Highest level of educational attainment</i>      |                           |                            |                      |
| Year 10 education                                   | 39 (62)                   | 0.74 (0.27)                | 0.81<br>(0.63, 0.98) |
| Year 12, trade, certificate/<br>diploma, university | 24 (38)                   | 0.68 (0.24)                | 0.72<br>(0.56, 0.84) |
| <i>Main language spoken at home</i>                 |                           |                            |                      |
| English                                             | 49 (78)                   | 0.70 (0.27)                | 0.73<br>(0.57, 0.98) |
| Other                                               | 14 (22)                   | 0.75 (0.21)                | 0.78<br>(0.72, 0.86) |
| <i>Children</i>                                     |                           |                            |                      |
| No Children                                         | 9 (14)                    | 0.80 (0.25)                | 0.92<br>(0.72, 1.00) |
| Children                                            | 54 (86)                   | 0.70 (0.26)                | 0.74<br>(0.61, 0.92) |
| <i>Remoteness Category</i>                          |                           |                            |                      |
| Outer Regional                                      | 34 (54)                   | 0.67 (0.29)                | 0.72<br>(0.47, 0.98) |
| Remote                                              | 11 (17)                   | 0.76 (0.22)                | 0.81<br>(0.63, 0.98) |
| Very Remote                                         | 18 (29)                   | 0.78 (0.20)                | 0.79<br>(0.71, 0.95) |
| <i>SEIFA score (deciles)<sup>a</sup></i>            |                           |                            |                      |
| 1-5                                                 | 22 (35)                   | 0.81 (0.20)                | 0.81<br>(0.74, 0.98) |
| 6-10                                                | 41 (65)                   | 0.67 (0.28)                | 0.73                 |

|                                        | N (%)   | AQoL Overall utility Score |                      |
|----------------------------------------|---------|----------------------------|----------------------|
|                                        |         | Mean (SD)                  | Median (IQR)         |
|                                        |         |                            | (0.48, 0.92)         |
| <i>Comorbidities</i>                   |         |                            |                      |
| 0                                      | 31 (49) | 0.73 (0.25)                | 0.78<br>(0.63, 0.93) |
| 1                                      | 23 (37) | 0.75 (0.25)                | 0.74<br>(0.63, 0.98) |
| 2-5                                    | 9 (14)  | 0.63 (0.31)                | 0.73<br>(0.36, 0.85) |
| <i>Cancer Type</i>                     |         |                            |                      |
| Breast                                 | 18 (29) | 0.77 (0.24)                | 0.83<br>(0.63, 0.98) |
| Head and neck                          | 9 (14)  | 0.50 (0.32)                | 0.48<br>(0.25, 0.72) |
| Digestive organs                       | 8 (12)  | 0.60 (0.19)                | 0.64<br>(0.48, 0.72) |
| Skin                                   | 8 (12)  | 0.76 (0.27)                | 0.79<br>(0.60, 1.00) |
| Male Genital Organ                     | 7 (11)  | 0.72 (0.32)                | 0.73<br>(0.67, 0.98) |
| Other <sup>b, c</sup>                  | 13 (21) | 0.83 (0.22)                | 0.81<br>(0.74, 0.98) |
| <i>Stage</i>                           |         |                            |                      |
| Local/Regional                         | 28 (44) | 0.79 (0.27)                | 0.93<br>(0.69, 1.00) |
| Advanced                               | 18 (29) | 0.60 (0.26)                | 0.65<br>(0.36, 0.78) |
| Unknown                                | 17 (27) | 0.71 (0.19)                | 0.74<br>(0.66, 0.84) |
| <i>Treatment Type</i>                  |         |                            |                      |
| Surgery with/without other treatment   | 35 (56) | 0.77 (0.25)                | 0.84<br>(0.64, 1.00) |
| Treatment without surgery <sup>d</sup> | 26 (41) | 0.64 (0.27)                | 0.73<br>(0.47, 0.81) |
| <i>Time Since Diagnosis</i>            |         |                            |                      |
| ≤3 months                              | 32 (51) | 0.72 (0.24)                | 0.75<br>(0.62, 0.93) |
| 3-12 months                            | 31 (49) | 0.71 (0.28)                | 0.74<br>(0.62, 1.00) |

Abbreviations: AQoL-4D: Australian Quality of Life – 4 Dimension Index; NT: Northern Territory; SD: Standard deviation

NOTES: a. Socioeconomic Index for Areas (SEIFA) index dichotomized as least disadvantaged (deciles 1-5) and most advantaged (quintiles 6-10); b. Other cancer types included: eye, brain and central nervous system cancers; ill-defined, secondary and unspecified cancers; female genital organ cancers; respiratory and intrathoracic organs; lymphoid, haematopoietic and related tissue cancers; c. Missing data n=2; d. Other treatment types include chemotherapy, radiotherapy and hormone therapy.
